# Supplementary material for: Malaria and Chikungunya Outbreak in Marsabit County, Kenya, May 2023: A Cross Sectional Study
Source: Research Square preprint supplement (doi:10.21203/rs.3.rs-7483405/v1), 2025-10-19
Supplement: Supplementary file 1 [file 990d3b3fea0b250c75623d38.pdf]

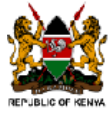

## Febrile Illness Outbreak Response Questionnaire, Marsabit County, May 2023

Interview Date \_\_\_\_ / \_\_\_\_ / \_\_\_\_ (dd/mm/year)

Interview Time: \_\_\_\_\_ Interviewer Name: \_\_\_\_\_

A case is any person presenting with febrile illness at the health facility or in the community, 13<sup>th</sup> to 24<sup>th</sup> May 2023.

### Section 1: Personal Information

Respondent Name: \_\_\_\_\_

If under 18 years, Name of caregiver/guardian: \_\_\_\_\_

(Note: 18 years and above is the legal accountability age in Kenya)

Respondent/Care giver/Guardian Contacts: \_\_\_\_\_

Consent from care giver/guardian for under 18 years to participate (Yes/No): \_\_\_\_\_

If yes, give consent form for care giver/guardian signing \_\_\_\_\_

Assent to participate for under 18 years (Yes/No): \_\_\_\_\_

If yes, give assent form for signing. \_\_\_\_\_

If no, End the interview.

1) Residence: \_\_\_\_\_

a) Sub-County \_\_\_\_\_

b) Ward \_\_\_\_\_

c) Village \_\_\_\_\_

2) Gender (Male / Female): \_\_\_\_\_

3) Age in years: \_\_\_\_\_

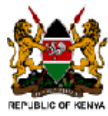

## Section 2: History of Illness

- 1) When did you start feeling unwell? (date) \_\_\_\_\_
- 2) Which symptoms were you having? (Check from the list below) \_\_\_\_\_

|                             |                       |           |
|-----------------------------|-----------------------|-----------|
| Hotness of the Body (fever) | Headache              | Jaundice  |
| Cough with blood            | Joint Pains           | Malaise   |
| Nose bleeding               | Vomiting              | Chills    |
| Convulsion                  | Abdominal pain        | Dizziness |
| Blurred vision              | Miscarriage /abortion | Diarrhoea |
| Double vision               | Muscle Aches          |           |
| Others (List) _____         |                       |           |
- 3) How many days have you been having this symptoms? (indicate number) \_\_\_\_\_
- 4) Have you received any treatment? ( Yes/No) \_\_\_\_\_
- 5) If yes, which treatment? (Probe from health facility or traditional healers or herbal) \_\_\_\_\_
- 6) If no, probe on why? \_\_\_\_\_

## Section 3: Exposure Details: Period of Interest is from 13<sup>th</sup> to 24<sup>th</sup> May 2023

- 1) Did you handle any meat, milk, blood from any sick animal during the period of interest? (Yes / No) \_\_\_\_\_
- 2) If yes, which sick animal (Tick)

|                     |       |      |     |        |
|---------------------|-------|------|-----|--------|
| Sheep               | Camel | Goat | Cow | Donkey |
| Others (List) _____ |       |      |     |        |
- 3) What events preceded this disease in the community? (Probe and List) \_\_\_\_\_
- 4) Where do you think this disease came from? (Probe and List) \_\_\_\_\_
- 5) Have you seen an increase in mosquito population in you community recently? (Yes / No) \_\_\_\_\_
- 6) Do you know of diseases cause by mosquito bites? (Yes or No) \_\_\_\_\_
- 7) If yes, list the diseases caused by mosquito bites? \_\_\_\_\_
- 8) Do you have a mosquito net? (Yes / No) \_\_\_\_\_
- 9) Where you sleeping under a treated mosquito net in the last one month? (Yes / No) \_\_\_\_\_  
\_\_\_\_\_



**Focused Manyatta Group Discussion Guide**

- 1) What are events did the community experience before the disease outbreak? Probe from the community members
- 2) What happens after heavy rains and flooding? (water contamination, increase in mosquito population, increase in grazing pasture, bushes and long grass\_\_\_\_\_etc.
- 3) What are some of the diseases associated with heavy rains and flooding? Water and mosquito borne disease. List some of these diseases. Malaria, Cholera....etc.
- 4) How do we feel when we have these diseases? Encourage group listing by members
- 5) How are these diseases spread? Encourage group listing by members
- 6) How do we protect ourselves from these diseases? Malaria and other vector borne diseases, water borne diseases
- 7) When we are ill, where do we seek for treatment? Encourage listing by members.
- 8) Where is the correct place to seek help when we feel unwell? Encourage listing by members and then focus the discussion to health facility
